# Supplementary material for: NK cell-derived extracellular vesicles enhance cytotoxicity and immune cell recruitment in non-small cell lung cancer
Source: Front Immunol. 2025 Jul 24;16:1633010. doi: 10.3389/fimmu.2025.1633010 (PMC12355224; doi:10.3389/fimmu.2025.1633010)
Supplement: Supplementary file 5 [file Table3.xlsx]

## Sheet: NK CCM Cytokine arrays
	AUC
Name	pt002_post	pt008_pre	pt008_post	pt005_pre	pt005_post	pt007_pre	pt007_post	pt010_post	pt012_pre
CONTROL DOT	10600.5	10071.8	10857.7	16678.1	12775.2	10779.8	11819.4	9868.26	9579.96
CCL1/I-309	6542.8		6534.9	8794.2	6063.5	3924.38	6738.91
MIP-1a/b	8901.1	5053.26	7474.2	10058.1	8296.1	3712.26	5909.5	3817.43	7295.96
CCL5/RANTES	8832.4	1486.18	8047.8	8115	6680.5	4731.43	7415.08	2787.84	7658.38
C5 complement	759.6	523.23	323.7	734.6	625.8	911.82	893.31	2374.31	1198.48
CONTROL DOT	12883.1	10962.4	11069.2	13670	12352.7	11489.3	13039	11591	11462.5
CXCL12/SDF-1								1286.89	384.99
GM-CSF	174.7		3050.5	1685.7	4413.1	6913.26	9055.74
ICAM/CD54	127	1644.43	300.8	716.8	1945	4219.08	5081.67	2112.31	2128.72
IFN-gamma					475.7	3101.89	3823.96
IL-1ra					299		690.36
IL-2	99	2756.18		498.6	718.7		427.34	6094.67	4005.01
IL-5			11202	2627.8	8217.5		910.18
IL-8			806.8		5746.2	9427.74	12218.1
IL-10					1189
IL-13			7072.5	2796.3	6718	1462.01	2405.31
IL-16					224.3		210.44		306.34
IL-18				536.4	884.8
IL-21	7728.7	8130.91	6946.1	8421.5	8505.7	5417.55	7075.62	10626.1	8658.08
IL-32					594.2	382.16	755.94
CONTROL DOT	10892	11025.4	10654.4	10826.7	14817.2	11462.8	12528.7	10638	10598.4
MIF	2550.7	1201.77	2499	4521.8	5481.7	2913.84	4449.96	2637.01	2105.18
SerpinE1	1502.2	1012.77	608.8	2011.3	4552	2257.55	2923.01	2621.55	1890.55
TNFa					884.2		252.51
NEG CONTROL DOT	10.1	28.12	2.4	47	-	393.02	146.49	4.12	224.61

## Sheet: NTA all NKEVs
Bin centre (nm)	pt008_post	pt005_pre	pt005_post	pt002_post	pt002_pre	pt007_pre	pt007_post	pt008_pre	pt010_pre	pt010_post	pt012_pre	pt012_post	pt004_pre	pt004_post	pt006_pre	pt006_post	pt009_pre	pt009_post	pt014_pre	pt014_post
2.5	0	0	0	0	0	0	0	0	0	0	0	0	0	0	0	0	0	0	0	0
7.5	0	0	0	0	0	0	0	0	0	0	0	0	0	0	0	0	0	0	0	0
12.5	0	0	0	0	0	0	0	0	0	0	0	0	0	0	57600	0	0	0	0	0
17.5	3600	0	0	3600	0	0	0	0	0	0	0	0	0	0	17700000	0	0	400	0	0
22.5	728000	16800	0	719000	0	0	0	16400	0	600	0	0	0	800	139000000	26800	1600	55600000	0	0
27.5	11400000	2430000	0	2870000	0	0	3600	1890000	0	23400	0	0	0	187000	287000000	1210000	737000	173000000	3200	0
32.5	59400000	39800000	2100	7790000	0	0	841000	19700000	4600	176000	0	0	0	2160000	357000000	12700000	12600000	48500000	219000	400
37.5	143000000	176000000	267000	39500000	174000	0	45400000	86700000	47900000	866000	0	0	1200	4130000	405000000	48700000	26600000	27900000	4430000	18400
42.5	179000000	399000000	5480000	179000000	6850000	0	180000000	232000000	540000000	4490000	0	0	91800	2890000	466000000	92900000	23500000	46600000	36300000	202000
47.5	164000000	520000000	38400000	328000000	2860000	8000	264000000	292000000	276000000	17300000	0	400	2010000	1240000	503000000	111000000	36700000	134000000	135000000	750000
52.5	147000000	599000000	110000000	299000000	138000	211000	303000000	192000000	161000000	35100000	2600	6000	16200000	555000	469000000	102000000	73200000	336000000	230000000	1480000
57.5	155000000	828000000	138000000	278000000	6600	1310000	347000000	114000000	242000000	65700000	60800	131000	58000000	1960000	383000000	87200000	127000000	454000000	262000000	2150000
62.5	204000000	1260000000	112000000	298000000	3000	3420000	421000000	98900000	469000000	51400000	815000	1030000	116000000	9810000	312000000	78700000	232000000	302000000	271000000	2870000
67.5	316000000	1770000000	102000000	336000000	13400	6120000	521000000	135000000	921000000	50800000	5380000	4160000	163000000	30200000	298000000	80300000	278000000	134000000	255000000	4060000
72.5	542000000	2430000000	129000000	389000000	74000	11500000	599000000	227000000	1160000000	107000000	22000000	15400000	178000000	55900000	353000000	94300000	209000000	73100000	215000000	6620000
77.5	972000000	3110000000	202000000	470000000	333000	28500000	623000000	448000000	1090000000	252000000	74000000	58000000	154000000	47500000	460000000	127000000	118000000	89400000	189000000	13400000
82.5	1760000000	3760000000	353000000	588000000	1110000	89100000	660000000	898000000	1140000000	551000000	205000000	187000000	122000000	33400000	598000000	193000000	71200000	234000000	205000000	41200000
87.5	3080000000	4590000000	621000000	760000000	2750000	280000000	812000000	1440000000	1400000000	1040000000	447000000	457000000	106000000	37200000	797000000	324000000	68600000	645000000	282000000	194000000
92.5	4900000000	5570000000	1030000000	1010000000	5450000	727000000	1180000000	1900000000	1820000000	1640000000	827000000	893000000	116000000	87700000	1140000000	593000000	143000000	1110000000	438000000	757000000
97.5	6630000000	6540000000	1560000000	1360000000	9710000	1470000000	1870000000	2480000000	2290000000	2310000000	1380000000	1850000000	162000000	276000000	1710000000	1220000000	377000000	1430000000	735000000	1840000000
102.5	7840000000	7380000000	2130000000	1830000000	18900000	2450000000	2860000000	3430000000	2730000000	3060000000	2070000000	3850000000	279000000	705000000	2530000000	2590000000	828000000	1910000000	1410000000	3030000000
107.5	8590000000	8140000000	2640000000	2430000000	52500000	3640000000	3890000000	4730000000	3170000000	4010000000	2700000000	5720000000	548000000	1410000000	3570000000	4340000000	1600000000	2690000000	2970000000	4040000000
112.5	9050000000	8840000000	2930000000	3080000000	191000000	4870000000	4670000000	5920000000	3670000000	5350000000	3140000000	6450000000	1050000000	2270000000	4750000000	5250000000	2850000000	3480000000	5450000000	5060000000
117.5	9200000000	9440000000	2910000000	3560000000	648000000	5810000000	5130000000	6570000000	4290000000	6960000000	3480000000	6250000000	1740000000	2820000000	5970000000	5280000000	4390000000	4000000000	7520000000	6320000000
122.5	8950000000	9890000000	2780000000	3700000000	1620000000	6280000000	5410000000	6600000000	5030000000	8160000000	3780000000	5430000000	2480000000	2820000000	7110000000	5140000000	5490000000	4320000000	7960000000	7640000000
127.5	8330000000	10100000000	2740000000	3470000000	2330000000	6310000000	5590000000	6280000000	5870000000	7970000000	4020000000	4420000000	3110000000	2720000000	8070000000	5270000000	5750000000	4790000000	7280000000	8440000000
132.5	7560000000	9920000000	2830000000	3040000000	2030000000	6120000000	5680000000	5860000000	6670000000	6410000000	4170000000	3590000000	3460000000	2840000000	8740000000	5850000000	5430000000	5690000000	6670000000	8150000000
137.5	6920000000	9450000000	3020000000	2550000000	1460000000	5850000000	5630000000	5450000000	7140000000	4660000000	4180000000	3020000000	3460000000	3170000000	9020000000	6880000000	4920000000	6970000000	6530000000	6820000000
142.5	6550000000	8760000000	3170000000	2130000000	1110000000	5540000000	5420000000	5090000000	6920000000	3530000000	4020000000	2610000000	3200000000	3510000000	8880000000	8170000000	4450000000	8150000000	6660000000	5260000000
147.5	6410000000	7990000000	3180000000	1810000000	914000000	5180000000	5160000000	4760000000	6090000000	2970000000	3710000000	2270000000	2870000000	3560000000	8360000000	9180000000	4130000000	8500000000	6770000000	4090000000
152.5	6390000000	7290000000	2970000000	1590000000	794000000	4810000000	4950000000	4450000000	5140000000	2720000000	3370000000	2060000000	2560000000	3140000000	7620000000	9310000000	3980000000	7710000000	6690000000	3480000000
157.5	6350000000	6730000000	2630000000	1460000000	722000000	4510000000	4870000000	4180000000	4430000000	2630000000	3080000000	2080000000	2320000000	2450000000	6840000000	8420000000	3950000000	6240000000	6300000000	3300000000
162.5	6220000000	6340000000	2250000000	1400000000	709000000	4310000000	4960000000	3960000000	3980000000	2650000000	2860000000	2440000000	2160000000	1810000000	6120000000	7070000000	3950000000	4840000000	5590000000	3370000000
167.5	6020000000	6110000000	1910000000	1380000000	781000000	4170000000	5170000000	3780000000	3690000000	2770000000	2680000000	3020000000	2060000000	1390000000	5530000000	5850000000	3860000000	3940000000	4720000000	3520000000
172.5	5800000000	5960000000	1640000000	1390000000	959000000	3980000000	5350000000	3590000000	3470000000	2940000000	2490000000	3400000000	2000000000	1200000000	5060000000	4920000000	3630000000	3480000000	3950000000	3590000000
177.5	5600000000	5840000000	1470000000	1390000000	1240000000	3700000000	5350000000	3330000000	3280000000	3040000000	2260000000	3170000000	1950000000	1160000000	4680000000	4220000000	3310000000	3240000000	3390000000	3520000000
182.5	5420000000	5690000000	1360000000	1380000000	1520000000	3370000000	5080000000	2990000000	3140000000	2950000000	1980000000	2510000000	1880000000	1230000000	4360000000	3670000000	3000000000	3040000000	3040000000	3320000000
187.5	5210000000	5460000000	1320000000	1340000000	1660000000	3070000000	4590000000	2610000000	3060000000	2690000000	1690000000	1840000000	1790000000	1370000000	4060000000	3260000000	2750000000	2820000000	2840000000	3030000000
192.5	4910000000	5140000000	1320000000	1290000000	1570000000	2810000000	4000000000	2250000000	3050000000	2400000000	1460000000	1310000000	1670000000	1510000000	3770000000	2960000000	2550000000	2660000000	2740000000	2680000000
197.5	4510000000	4750000000	1340000000	1210000000	1340000000	2530000000	3440000000	1960000000	3100000000	2140000000	1280000000	904000000	1540000000	1560000000	3470000000	2770000000	2350000000	2660000000	2710000000	2330000000
202.5	4000000000	4330000000	1360000000	1140000000	1090000000	2220000000	2990000000	1740000000	3160000000	1910000000	1160000000	615000000	1420000000	1470000000	3170000000	2670000000	2130000000	2840000000	2740000000	2010000000
207.5	3390000000	3910000000	1350000000	1060000000	886000000	1880000000	2680000000	1610000000	3190000000	1700000000	1070000000	437000000	1300000000	1270000000	2900000000	2610000000	1910000000	3100000000	2820000000	1740000000
212.5	2730000000	3540000000	1310000000	977000000	735000000	1570000000	2490000000	1530000000	3120000000	1510000000	990000000	349000000	1210000000	1030000000	2650000000	2530000000	1740000000	3310000000	2920000000	1540000000
217.5	2090000000	3240000000	1230000000	892000000	617000000	1310000000	2380000000	1500000000	2920000000	1370000000	904000000	335000000	1130000000	810000000	2440000000	2400000000	1630000000	3370000000	2970000000	1410000000
222.5	1550000000	3030000000	1120000000	803000000	516000000	1120000000	2320000000	1490000000	2610000000	1270000000	819000000	388000000	1060000000	633000000	2250000000	2220000000	1560000000	3290000000	2890000000	1350000000
227.5	1150000000	2890000000	991000000	711000000	426000000	1020000000	2280000000	1500000000	2230000000	1200000000	744000000	509000000	1010000000	503000000	2090000000	2030000000	1510000000	3070000000	2640000000	1340000000
232.5	882000000	2820000000	854000000	622000000	346000000	974000000	2220000000	1510000000	1860000000	1120000000	683000000	692000000	967000000	415000000	1960000000	1860000000	1440000000	2700000000	2260000000	1370000000
237.5	724000000	2780000000	727000000	545000000	280000000	977000000	2110000000	1520000000	1520000000	1010000000	640000000	898000000	934000000	365000000	1840000000	1730000000	1370000000	2210000000	1850000000	1410000000
242.5	642000000	2750000000	621000000	485000000	227000000	1000000000	1940000000	1530000000	1250000000	886000000	611000000	1060000000	907000000	347000000	1750000000	1640000000	1280000000	1710000000	1460000000	1440000000
247.5	609000000	2680000000	543000000	442000000	186000000	1030000000	1700000000	1520000000	1060000000	775000000	590000000	1110000000	883000000	360000000	1670000000	1570000000	1210000000	1310000000	1140000000	1450000000
252.5	614000000	2550000000	494000000	413000000	154000000	1060000000	1440000000	1500000000	929000000	700000000	570000000	1040000000	862000000	398000000	1610000000	1510000000	1170000000	1060000000	901000000	1440000000
257.5	647000000	2330000000	469000000	392000000	129000000	1080000000	1210000000	1450000000	854000000	661000000	545000000	896000000	840000000	451000000	1550000000	1440000000	1150000000	930000000	743000000	1400000000
262.5	702000000	2010000000	462000000	371000000	109000000	1090000000	1030000000	1370000000	824000000	642000000	513000000	715000000	815000000	496000000	1490000000	1360000000	1140000000	869000000	654000000	1330000000
267.5	774000000	1630000000	467000000	347000000	93200000	1090000000	879000000	1270000000	826000000	625000000	474000000	541000000	786000000	508000000	1410000000	1270000000	1140000000	835000000	619000000	1230000000
272.5	852000000	1260000000	476000000	317000000	81600000	1070000000	755000000	1140000000	850000000	599000000	429000000	398000000	752000000	472000000	1310000000	1170000000	1140000000	805000000	625000000	1100000000
277.5	923000000	946000000	482000000	286000000	74100000	1010000000	642000000	989000000	879000000	557000000	381000000	292000000	716000000	399000000	1200000000	1050000000	1110000000	772000000	659000000	942000000
282.5	971000000	719000000	482000000	256000000	70700000	906000000	534000000	839000000	900000000	503000000	331000000	217000000	677000000	312000000	1070000000	916000000	1050000000	738000000	708000000	778000000
287.5	981000000	575000000	472000000	230000000	71900000	768000000	437000000	698000000	899000000	446000000	281000000	166000000	639000000	235000000	942000000	787000000	960000000	717000000	762000000	622000000
292.5	946000000	492000000	453000000	208000000	78200000	625000000	357000000	576000000	868000000	395000000	234000000	131000000	600000000	176000000	825000000	666000000	844000000	727000000	815000000	486000000
297.5	870000000	451000000	424000000	191000000	90000000	498000000	299000000	478000000	807000000	353000000	191000000	106000000	561000000	138000000	725000000	562000000	716000000	791000000	862000000	376000000
302.5	765000000	438000000	385000000	178000000	107000000	399000000	266000000	406000000	727000000	312000000	155000000	88100000	521000000	115000000	641000000	475000000	593000000	928000000	899000000	294000000
307.5	647000000	445000000	334000000	166000000	129000000	329000000	260000000	359000000	639000000	261000000	125000000	75000000	480000000	103000000	573000000	405000000	485000000	1130000000	922000000	235000000
312.5	532000000	465000000	276000000	156000000	154000000	282000000	281000000	333000000	555000000	199000000	102000000	65900000	437000000	97800000	519000000	349000000	398000000	1350000000	927000000	197000000
317.5	428000000	493000000	215000000	148000000	178000000	253000000	335000000	321000000	483000000	134000000	85200000	60700000	392000000	97300000	476000000	306000000	331000000	1500000000	912000000	173000000
322.5	342000000	521000000	159000000	140000000	200000000	238000000	424000000	315000000	426000000	80400000	72600000	59000000	346000000	98700000	441000000	276000000	282000000	1500000000	872000000	162000000
327.5	274000000	537000000	115000000	132000000	214000000	234000000	542000000	309000000	383000000	44700000	63300000	60800000	302000000	100000000	413000000	257000000	248000000	1350000000	811000000	162000000
332.5	223000000	532000000	82700000	125000000	219000000	239000000	672000000	297000000	353000000	24200000	56400000	65600000	261000000	101000000	389000000	253000000	227000000	1120000000	730000000	170000000
337.5	186000000	500000000	61600000	119000000	214000000	253000000	785000000	276000000	334000000	13600000	51200000	72900000	224000000	101000000	370000000	266000000	215000000	882000000	638000000	187000000
342.5	162000000	439000000	48700000	112000000	198000000	273000000	854000000	248000000	321000000	8370000	47000000	82200000	193000000	103000000	353000000	301000000	211000000	680000000	544000000	210000000
347.5	146000000	358000000	41500000	105000000	176000000	295000000	867000000	216000000	314000000	5910000	43900000	92600000	168000000	108000000	339000000	358000000	214000000	519000000	453000000	236000000
352.5	138000000	272000000	38000000	98800000	151000000	314000000	828000000	185000000	309000000	4850000	41900000	103000000	150000000	115000000	326000000	429000000	221000000	394000000	371000000	262000000
357.5	136000000	197000000	36800000	92200000	126000000	323000000	750000000	156000000	306000000	4550000	41300000	111000000	137000000	120000000	315000000	496000000	231000000	297000000	301000000	278000000
362.5	138000000	145000000	37000000	85700000	103000000	318000000	651000000	133000000	303000000	4780000	42400000	114000000	130000000	116000000	304000000	529000000	241000000	223000000	244000000	278000000
367.5	145000000	123000000	38300000	79600000	82500000	300000000	541000000	116000000	299000000	5500000	45700000	110000000	128000000	99000000	293000000	506000000	248000000	167000000	197000000	256000000
372.5	156000000	130000000	40200000	73900000	64700000	272000000	428000000	105000000	293000000	6820000	51000000	97300000	130000000	73300000	281000000	431000000	251000000	127000000	161000000	213000000
377.5	168000000	151000000	42400000	68800000	49600000	242000000	321000000	100000000	284000000	9020000	57700000	79800000	136000000	47200000	267000000	333000000	249000000	97700000	133000000	160000000
382.5	182000000	166000000	44800000	64100000	37200000	214000000	227000000	99400000	269000000	12600000	64500000	63800000	145000000	28100000	251000000	247000000	240000000	77300000	112000000	109000000
387.5	196000000	156000000	46900000	59900000	27300000	189000000	152000000	102000000	249000000	18400000	68900000	55800000	156000000	18100000	233000000	194000000	227000000	63400000	96700000	71200000
392.5	208000000	122000000	48600000	55900000	20000000	164000000	95400000	107000000	222000000	27400000	68400000	59600000	168000000	15400000	214000000	176000000	209000000	54000000	86500000	51100000
397.5	216000000	79400000	49700000	51900000	14900000	138000000	57100000	112000000	190000000	39700000	62000000	74300000	178000000	17300000	196000000	183000000	188000000	48200000	80500000	47600000
402.5	217000000	43300000	50300000	48000000	11600000	111000000	32800000	115000000	154000000	53700000	50500000	95000000	185000000	22300000	179000000	205000000	167000000	45500000	78200000	56000000
407.5	209000000	20400000	51000000	43800000	9760000	87700000	18300000	114000000	120000000	65100000	36700000	114000000	187000000	29300000	166000000	233000000	146000000	46100000	79500000	70500000
412.5	191000000	8790000	52200000	39500000	8970000	69200000	10000000	110000000	90500000	69300000	23900000	122000000	183000000	37600000	157000000	255000000	126000000	51500000	84200000	85600000
417.5	163000000	3850000	54400000	34900000	8980000	56500000	5400000	103000000	68600000	65900000	14000000	116000000	173000000	45100000	152000000	261000000	108000000	64200000	92200000	96000000
422.5	129000000	2110000	57400000	30300000	9570000	48400000	2920000	93100000	54300000	59600000	7440000	98100000	157000000	49400000	149000000	241000000	93000000	88000000	103000000	97900000
427.5	94900000	1730000	60400000	25700000	10600000	43500000	1590000	82000000	45900000	55900000	3600000	76100000	138000000	47600000	146000000	200000000	80200000	126000000	117000000	90100000
432.5	65700000	2000000	61600000	21300000	11800000	40700000	872000	70200000	41400000	55900000	1590000	56300000	116000000	39500000	141000000	147000000	69700000	178000000	133000000	74500000
437.5	43100000	2730000	59500000	17200000	13000000	39400000	489000	58800000	39100000	56000000	640000	40400000	95500000	27400000	132000000	96700000	61000000	232000000	148000000	55300000
442.5	26800000	4030000	53200000	13500000	14100000	39000000	281000	48400000	38100000	51900000	235000	27800000	76500000	15600000	118000000	59300000	53700000	272000000	161000000	36800000
447.5	15600000	6100000	43200000	10300000	14800000	39300000	166000	39700000	38000000	42400000	78400	17800000	60200000	7180000	102000000	35900000	47300000	275000000	170000000	21900000
452.5	8430000	9200000	31600000	7730000	15100000	39900000	102000	32800000	38500000	30100000	23800	10500000	46900000	2630000	83300000	23500000	41900000	236000000	173000000	11800000
457.5	4160000	13500000	20600000	5630000	14700000	40500000	65600	27800000	39400000	18900000	6600	5570000	36600000	759000	65500000	17600000	37500000	169000000	168000000	5670000
462.5	1870000	19000000	12100000	4020000	13900000	40400000	44600	24300000	40400000	10900000	1600	2710000	28700000	172000	49700000	15300000	34600000	99600000	156000000	2470000
467.5	762000	25300000	6560000	2800000	12800000	39300000	32200	21900000	41000000	6080000	400	1210000	23000000	30200	36800000	14700000	33200000	48100000	138000000	973000
472.5	282000	31200000	3470000	1910000	11500000	36600000	25200	20200000	40900000	3290000	0	503000	18900000	4200	26800000	15000000	32900000	19000000	117000000	348000
477.5	94400	35400000	1910000	1280000	10100000	32300000	21800	19000000	39700000	1690000	0	195000	16000000	400	19400000	15800000	33200000	6100000	95300000	113000
482.5	28800	36600000	1130000	829000	8930000	26700000	21200	18100000	37100000	805000	0	70600	14000000	0	14200000	17000000	33400000	1640000	74500000	33800
487.5	8000	34400000	737000	523000	7930000	20500000	24200	17500000	33000000	346000	0	24000	12700000	0	10600000	18400000	33100000	484000	56500000	9200
492.5	2000	29200000	517000	319000	7180000	14400000	33600	17300000	27600000	133000	0	7600	12000000	0	8200000	20000000	32200000	456000	41700000	2400
497.5	400	22300000	392000	189000	6670000	9210000	58000	17700000	21600000	45200	0	2200	11600000	0	6600000	21500000	30600000	1080000	30100000	600
502.5	0	15300000	321000	109000	6410000	5330000	120000	18700000	15700000	13600	0	600	11600000	0	5570000	23000000	28600000	2780000	21400000	0
507.5	0	9430000	286000	63800	6380000	2770000	279000	20100000	10400000	3600	0	0	11800000	0	4940000	24300000	26300000	6760000	14900000	0
512.5	0	5260000	277000	41800	6580000	1290000	684000	21700000	6270000	800	0	0	12000000	0	4630000	25300000	23800000	15100000	10200000	0
517.5	0	2710000	289000	35600	6980000	537000	1670000	23000000	3400000	0	0	0	12400000	0	4560000	26500000	21200000	30400000	6780000	0
522.5	0	1410000	326000	41300	7560000	199000	3870000	23400000	1640000	0	0	0	12600000	0	4700000	28700000	18600000	54200000	4370000	0
527.5	0	937000	390000	58000	8250000	65400	8200000	22600000	702000	0	0	0	12600000	0	5030000	33700000	16100000	84600000	2700000	0
532.5	0	1020000	493000	86900	8940000	19200	15400000	20500000	264000	0	0	0	12400000	0	5550000	43700000	13600000	114000000	1580000	0
537.5	0	1510000	645000	131000	9430000	5000	24800000	17300000	86400	0	0	0	11800000	0	6250000	59200000	11300000	133000000	868000	0
542.5	0	2360000	865000	196000	9500000	1200	33400000	13400000	24600	0	0	0	10900000	0	7110000	77300000	9080000	131000000	439000	0
547.5	0	3570000	1170000	286000	8960000	200	37100000	9410000	6000	0	0	0	9800000	0	8110000	91400000	7060000	111000000	202000	0
552.5	0	5050000	1580000	405000	7750000	0	33500000	6010000	1200	0	0	0	8650000	0	9190000	94700000	5280000	79300000	84000	0
557.5	0	6650000	2100000	557000	6020000	0	25000000	3450000	200	0	0	0	7640000	0	10300000	84700000	3760000	48300000	30800	0
562.5	0	8090000	2710000	741000	4120000	0	16200000	1770000	0	0	0	0	6940000	0	11200000	64700000	2530000	25100000	10000	0
567.5	0	9070000	3390000	953000	2450000	0	10400000	811000	0	0	0	0	6620000	0	11900000	41600000	1600000	11200000	2800	0
572.5	0	9350000	4060000	1180000	1240000	0	7360000	329000	0	0	0	0	6660000	200	12300000	22300000	945000	4270000	800	0
577.5	0	8850000	4630000	1410000	528000	0	5530000	118000	0	0	0	0	6950000	1800	12300000	9900000	516000	1420000	0	0
582.5	0	7670000	5010000	1610000	187000	0	3950000	37400	0	0	0	0	7330000	10000	11900000	3790000	258000	411000	0	0
587.5	0	6080000	5140000	1770000	54400	0	2490000	10400	0	0	0	0	7670000	47600	11100000	1400000	118000	105000	0	0
592.5	0	4410000	4980000	1870000	13000	0	1350000	2600	0	0	0	0	7910000	190000	9920000	583000	49200	24000	0	0
597.5	0	2920000	4570000	1890000	2400	0	617000	600	0	0	0	0	8130000	637000	8610000	290000	18400	4800	0	0
602.5	0	1760000	3970000	1830000	121000	0	239000	0	0	0	0	0	8480000	1760000	7220000	158000	6400	800	400	0
607.5	0	971000	3280000	1700000	0	0	77400	0	0	0	0	0	9160000	4010000	5880000	86400	2000	0	1200	0
612.5	0	488000	2580000	1520000	0	0	21000	0	0	0	0	0	10300000	7450000	4650000	46800	400	0	2400	0
617.5	0	224000	1950000	1290000	0	0	4800	0	0	0	0	0	11900000	11300000	3600000	24800	0	0	4800	0
622.5	0	94000	1420000	1050000	0	0	1000	0	0	0	0	0	13700000	13900000	2720000	12800	0	0	9200	0
627.5	0	36000	995000	822000	0	0	0	0	0	0	0	0	15600000	14000000	2020000	6400	0	0	17200	0
632.5	0	12800	682000	615000	0	0	0	0	0	0	0	0	17000000	11400000	1480000	3200	0	0	32400	0
637.5	0	4000	458000	440000	0	0	0	0	0	0	0	0	17700000	7620000	1080000	1600	0	0	58000	0
642.5	0	1200	303000	302000	0	0	0	0	0	0	0	0	17400000	4140000	776000	800	0	0	101000	0
647.5	0	0	200000	199000	0	0	0	0	0	0	0	0	16100000	1840000	558000	0	0	0	169000	0
652.5	0	0	131000	125000	0	0	0	0	0	0	0	0	14000000	668000	400000	0	0	0	270000	0
657.5	0	0	86900	75500	0	0	0	0	0	0	0	0	11500000	199000	288000	0	0	0	415000	0
662.5	0	0	58100	43700	0	0	0	0	0	0	0	0	8760000	48800	207000	0	0	0	610000	0
667.5	0	0	39500	24300	0	0	0	0	0	0	0	0	6270000	10000	150000	0	0	0	856000	0
672.5	0	0	27400	12900	0	0	0	0	0	0	0	0	4200000	1600	109000	0	0	0	1150000	0
677.5	0	0	19500	6600	0	0	0	0	0	0	0	0	2630000	200	80000	0	0	0	1470000	0
682.5	0	0	14300	3300	0	0	0	0	0	0	0	0	1550000	0	58800	0	0	0	1800000	0
687.5	0	0	10700	1500	0	0	0	0	0	0	0	0	851000	0	43600	0	0	0	2100000	0
692.5	0	0	8300	700	0	0	0	0	0	0	0	0	438000	0	32400	0	0	0	2330000	0
697.5	0	0	6600	300	0	0	0	0	0	0	0	0	212000	0	24000	0	0	0	2480000	0

## Sheet: EV characterization summary
	PT ID and tumor type	Time point	EV size (nm)	EVs/ml CCM (billions)	Total EV count (billions)	ug protein/ml CCM	total ug protein
	PT002 LUAD (mucinous)	pre	188.5	2.05333	12.32	11.1462	66.8772
		post	159.5	3.56451	36.358	17.8537	182.108
	PT004 LUAD (acinar)	pre	197.1	3.88034	112.53	32.7866	950.813
		post	171	3.904	68.32	19.0508	333.388
	PT005 LUSC (keratinizing)	pre	159.5	6.19733	185.92	23.3067	699.2
		post	169	4.34238	43.4238	17.091	170.91
	PT006 LUSC (keratinizing)	pre	174.1	7.63384	1164.16	24.709	3768.12
		post	180.1	9.60828	2089.8	33.2009	7221.2
	PT007 LUAD (acinar)	pre	173.5	10.7261	2408	37.7499	8474.85
		post	177.4	15.6697	3126.1	33.1879	6620.99
	PT008 LUAD (lepidic)	pre	169.2	4.10143	57.42	18.8073	263.302
		post	158.5	5.41154	140.7	22.0096	572.25
	PT009 LUAD (acinar)	pre	185	6.64615	604.8	32.9704	3000.31
		post	187.8	8.6245	758.956	30.4031	2675.48
	PT010 LUAD (acinar)	pre	174.3	3.8335	107.338	21.45	600.6
		post	158.6	3.24	38.232	11.229	132.502
	PT012 LUSC (non-kerat.)	pre	161.7	3.47015	23.25	14.3164	95.9198
		post	157.8	3.403	17.015	16.3428	81.714
	PT014 LUAD (acinar)	pre	180.1	7.76889	55.936	24.2676	174.727
		post	169.7	6.8675	164.82	26.9127	645.906
		Mean	172.62	6.04732	560.77	23.4396	1836.56
		St. dev	11.1596	3.20357	896.34	7.70787	2583.76
